# Supplementary material for: Estimating the contribution of Greenland Halibut (Reinhardtius hippoglossoides) stocks to nurseries by means of genotyping‐by‐sequencing: Sex and time matter
Source: PubMed Central journal article supplement (PMC7513701; doi:10.1111/eva.12979), 2020-05-20

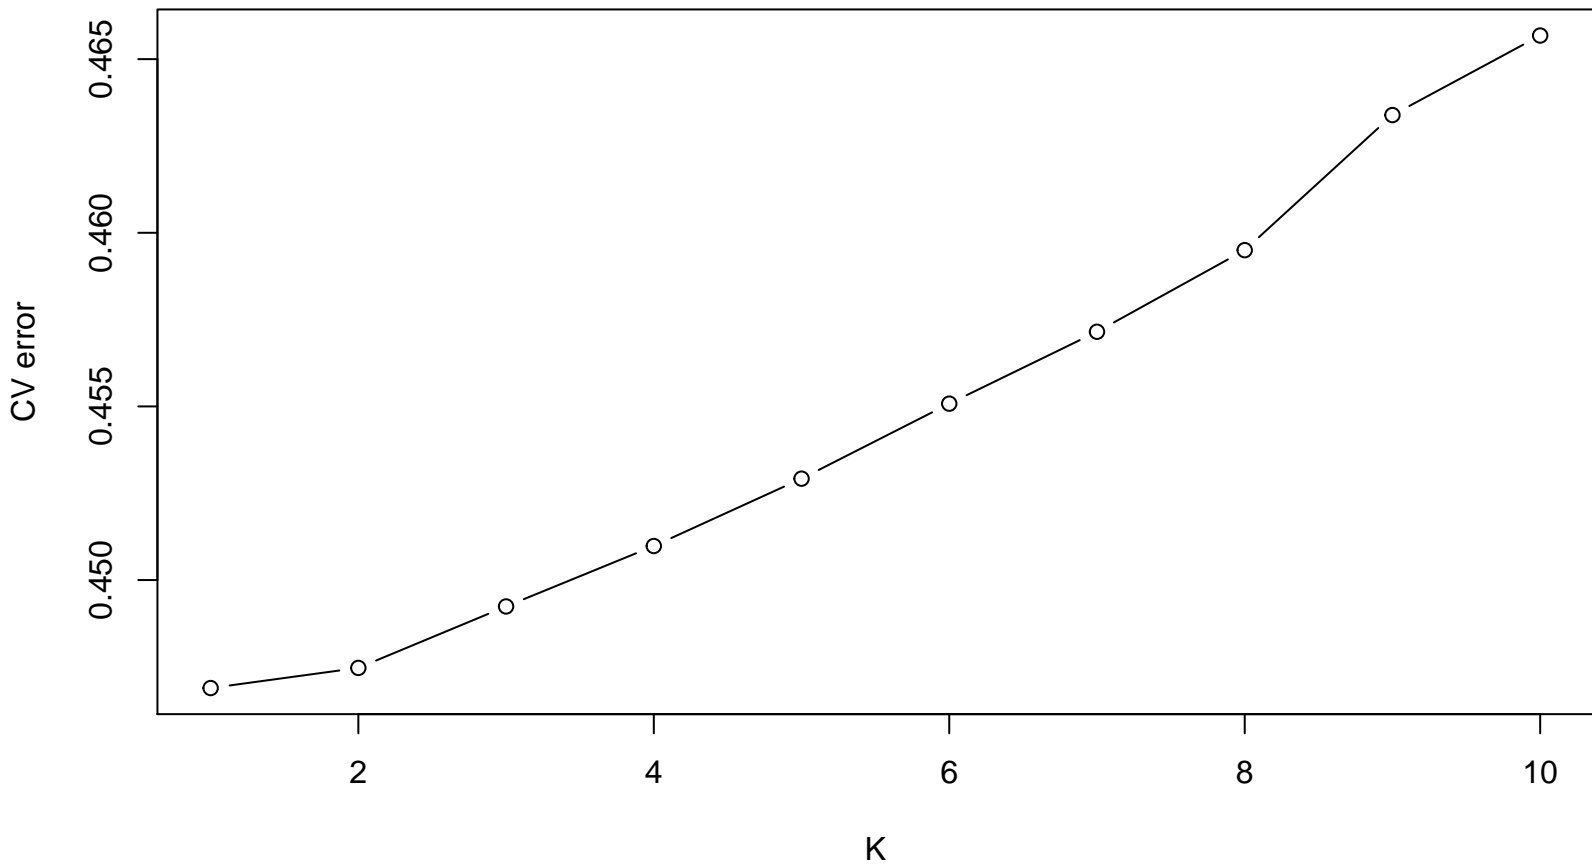

Supplement: EVA-13-2155-s005.pdf [file EVA-13-2155-s005.pdf]
